# Supplementary material
Source: PubMed Central journal article supplement (PMC6195222)
Supplement: NIHMS855247-supplement-SI.pdf [file NIHMS855247-supplement-SI.pdf]

## Supplementary Data for

**NMR Spectroscopy Studies of Electronic Effects and Equilibrium in the Organogold-to-Boron Transmetalation Reaction and Studies Towards its Application to the Alkoxyboration Addition of Boron–Oxygen  $\sigma$  Bonds to Alkynes**

Joshua J. Hirner and Suzanne A. Blum\*

University of California—Irvine, Department of Chemistry, 1102 Natural Science 2, Irvine, CA 92697-2025, USA

1. Atomic coordinates for optimized structures of compounds from Tables 2 and 3 calculated at the B3LYP/6-311G level of theory

Table 2, 3-hexyne starting material (**11**).

| <i>Atom</i> | <i>x (Å)</i> | <i>y (Å)</i> | <i>z (Å)</i> | <i>Atom</i> | <i>x (Å)</i> | <i>y (Å)</i> | <i>z (Å)</i> |
|-------------|--------------|--------------|--------------|-------------|--------------|--------------|--------------|
| C           | 0.5655       | 0.2074       | -0.0806      | H           | 3.9938       | -0.0401      | 0.1189       |
| C           | 0.5655       | 0.2074       | -0.0806      | H           | 2.9008       | -1.1863      | -0.6756      |
| C           | -1.9488      | -0.6823      | -0.0769      | C           | -2.9782      | 0.4446       | 0.1223       |
| C           | 1.9488       | 0.6824       | -0.0770      | H           | -2.0699      | -1.4315      | 0.7141       |
| C           | 2.9782       | -0.4446      | 0.1224       | H           | -2.1543      | -1.2022      | -1.0198      |
| H           | 2.0700       | 1.4316       | 0.7139       | H           | -2.8149      | 0.9557       | 1.0736       |
| H           | 2.1544       | 1.2022       | -1.0199      | H           | -3.9938      | 0.0400       | 0.1189       |
| H           | 2.8148       | -0.9556      | 1.0737       | H           | -2.9009      | 1.1862       | -0.6757      |

Table 2, entry 1, boric ester starting material **7g**.

| <i>Atom</i> | <i>x (Å)</i> | <i>y (Å)</i> | <i>z (Å)</i> | <i>Atom</i> | <i>x (Å)</i> | <i>y (Å)</i> | <i>z (Å)</i> |
|-------------|--------------|--------------|--------------|-------------|--------------|--------------|--------------|
| C           | -2.3627      | 0.2713       | 0.0000       | H           | 0.5698       | 2.9057       | 0.0000       |
| C           | -1.0344      | -0.1048      | 0.0000       | O           | -0.4857      | -1.4028      | 0.0000       |
| C           | -2.6266      | 1.6519       | 0.0000       | O           | 1.2351       | 0.1491       | 0.0000       |
| C           | -1.5882      | 2.5925       | 0.0000       | B           | 0.9130       | -1.2297      | 0.0000       |
| C           | -0.2406      | 2.1924       | 0.0000       | O           | 1.7958       | -2.2425      | 0.0000       |
| C           | 0.0000       | 0.8330       | 0.0000       | C           | 3.2428       | -2.0742      | 0.0000       |
| H           | -3.1528      | -0.4643      | 0.0000       | H           | 3.6697       | -3.0713      | 0.0000       |
| H           | -3.6526      | 1.9923       | 0.0000       | H           | 3.5615       | -1.5319      | 0.8895       |
| H           | -1.8249      | 3.6473       | 0.0000       | H           | 3.5615       | -1.5319      | -0.8895      |

Table 2, entry 1, alkoxyboration product **13g**.

| <i>Atom</i> | <i>x (Å)</i> | <i>y (Å)</i> | <i>z (Å)</i> | <i>Atom</i> | <i>x (Å)</i> | <i>y (Å)</i> | <i>z (Å)</i> |
|-------------|--------------|--------------|--------------|-------------|--------------|--------------|--------------|
| C           | -2.2617      | -0.2753      | -0.2754      | B           | 0.1962       | 0.3395       | -0.1887      |
| C           | -1.2852      | 0.6717       | -0.2629      | O           | 0.8277       | -0.9354      | -0.0984      |
| O           | -3.5787      | 0.2040       | -0.2546      | O           | 1.2122       | 1.3338       | -0.2042      |
| C           | -1.6577      | 2.1527       | -0.2775      | C           | 2.4463       | 0.6681       | -0.1262      |
| C           | -1.9217      | 2.7214       | 1.1324       | C           | 2.2162       | -0.7058      | -0.0632      |
| H           | -0.8494      | 2.7200       | -0.7417      | C           | 3.7223       | 1.1986       | -0.1099      |
| H           | -2.5506      | 2.2922       | -0.8879      | C           | 4.7841       | 0.2824       | -0.0264      |
| H           | -1.0409      | 2.6142       | 1.7691       | C           | 4.5519       | -1.0986      | 0.0364       |
| H           | -2.7542      | 2.2009       | 1.6074       | C           | 3.2477       | -1.6213      | 0.0186       |
| H           | -2.1697      | 3.7846       | 1.0811       | H           | 3.0554       | -2.6828      | 0.0663       |
| C           | -2.0727      | -1.7696      | -0.2140      | H           | 3.8865       | 2.2646       | -0.1594      |
| C           | -2.3353      | -2.3481      | 1.1954       | H           | 5.7999       | 0.6521       | -0.0104      |
| H           | -2.7291      | -2.2587      | -0.9392      | H           | 5.3913       | -1.7770      | 0.0999       |
| H           | -1.0541      | -2.0075      | -0.5054      | C           | -4.6894      | -0.6172      | -0.7175      |
| H           | -1.6189      | -1.9393      | 1.9084       | H           | -4.5586      | -0.9035      | -1.7625      |
| H           | -2.2239      | -3.4338      | 1.1866       | H           | -5.5617      | 0.0216       | -0.6239      |
| H           | -3.3376      | -2.1117      | 1.5565       | H           | -4.8245      | -1.5068      | -0.1025      |

Table 2, entry 2, boric ester starting material **7e**.

| <i>Atom</i> | <i>x (Å)</i> | <i>y (Å)</i> | <i>z (Å)</i> | <i>Atom</i> | <i>x (Å)</i> | <i>y (Å)</i> | <i>z (Å)</i> |
|-------------|--------------|--------------|--------------|-------------|--------------|--------------|--------------|
| C           | 2.4624       | 3.6339       | 0.0000       | C           | -1.7756      | -0.7865      | 0.0000       |
| C           | 1.6847       | 2.4931       | 0.0000       | C           | -3.1627      | -0.8935      | 0.0000       |
| C           | 3.8550       | 3.4454       | 0.0000       | C           | -0.9656      | -1.9229      | 0.0000       |
| C           | 4.4177       | 2.1622       | 0.0000       | C           | -1.5726      | -3.1801      | 0.0000       |
| C           | 3.6113       | 1.0110       | 0.0000       | C           | -2.9689      | -3.3245      | 0.0000       |
| C           | 2.2463       | 1.2158       | 0.0000       | C           | -3.7501      | -2.1594      | 0.0000       |
| H           | 2.0157       | 4.6166       | 0.0000       | C           | -3.6040      | -4.6970      | 0.0000       |
| H           | 4.5036       | 4.3103       | 0.0000       | H           | -4.6923      | -4.6295      | 0.0000       |
| H           | 5.4931       | 2.0522       | 0.0000       | H           | -3.3084      | -5.2743      | 0.8799       |
| H           | 4.0309       | 0.0164       | 0.0000       | H           | -3.3084      | -5.2743      | -0.8799      |
| O           | 0.2800       | 2.3823       | 0.0000       | H           | -0.9455      | -4.0632      | 0.0000       |
| O           | 1.2042       | 0.2609       | 0.0000       | H           | 0.1090       | -1.8256      | 0.0000       |
| B           | 0.0000       | 1.0027       | 0.0000       | H           | -4.8295      | -2.2412      | 0.0000       |
| O           | -1.2564      | 0.5200       | 0.0000       | H           | -3.7585      | 0.0074       | 0.0000       |

Table 2, entry 2, alkoxyboration product **13e**.

| <i>Atom</i> | <i>x (Å)</i> | <i>y (Å)</i> | <i>z (Å)</i> | <i>Atom</i> | <i>x (Å)</i> | <i>y (Å)</i> | <i>z (Å)</i> |
|-------------|--------------|--------------|--------------|-------------|--------------|--------------|--------------|
| C           | 0.6070       | 0.1864       | 0.4131       | C           | -3.7362      | -0.9209      | 0.0052       |
| C           | -0.4436      | 0.9185       | -0.0302      | C           | -5.4045      | 0.6147       | -0.8646      |
| O           | 1.8409       | 0.8733       | 0.5482       | C           | -6.3501      | -0.4076      | -0.6815      |
| C           | 3.0589       | 0.3089       | 0.1178       | C           | -5.9819      | -1.6579      | -0.1645      |
| C           | 4.1838       | 0.5485       | 0.9063       | C           | -4.6522      | -1.9383      | 0.1916       |
| C           | 5.4277       | 0.0790       | 0.4859       | H           | -4.3556      | -2.8966      | 0.5910       |
| C           | 5.5704       | -0.6389      | -0.7133      | H           | -5.6738      | 1.5817       | -1.2621      |
| C           | 4.4227       | -0.8576      | -1.4888      | H           | -7.3824      | -0.2247      | -0.9455      |
| C           | 3.1706       | -0.3856      | -1.0864      | H           | -6.7348      | -2.4230      | -0.0364      |
| H           | 4.0713       | 1.1060       | 1.8250       | H           | 0.7480       | 2.5020       | -0.8634      |
| H           | 6.2998       | 0.2714       | 1.0984       | C           | -0.4370      | 3.3615       | 0.7236       |
| H           | 4.5073       | -1.3948      | -2.4251      | H           | -0.9690      | 2.6186       | -1.2328      |
| H           | 2.2980       | -0.5388      | -1.7063      | H           | 0.2953       | 3.1685       | 1.5086       |
| C           | 6.9194       | -1.1703      | -1.1438      | H           | -1.4360      | 3.2754       | 1.1559       |
| H           | 7.7162       | -0.4540      | -0.9354      | H           | -0.3078      | 4.3917       | 0.3834       |
| H           | 6.9382       | -1.3873      | -2.2125      | C           | 0.6113       | -1.2284      | 0.9288       |
| H           | 7.1699       | -2.0964      | -0.6177      | C           | 0.7786       | -1.2918      | 2.4636       |
| C           | -0.2515      | 2.3744       | -0.4476      | H           | 1.4262       | -1.7863      | 0.4611       |
| B           | -1.8674      | 0.3712       | -0.0976      | H           | -0.3170      | -1.7149      | 0.6433       |
| O           | -2.3525      | -0.9128      | 0.2698       | H           | 1.7096       | -0.8220      | 2.7822       |
| O           | -2.9586      | 1.1372       | -0.5826      | H           | 0.7907       | -2.3309      | 2.7971       |
| C           | -4.1014      | 0.3221       | -0.5094      | H           | -0.0479      | -0.7841      | 2.9627       |

Table 2, entry 3, boric ester starting material **7h**.

| <i>Atom</i> | <i>x (Å)</i> | <i>y (Å)</i> | <i>z (Å)</i> | <i>Atom</i> | <i>x (Å)</i> | <i>y (Å)</i> | <i>z (Å)</i> |
|-------------|--------------|--------------|--------------|-------------|--------------|--------------|--------------|
| O           | 1.3447       | 0.4301       | 0.0000       | H           | 2.8450       | -3.9670      | 0.0000       |
| B           | 0.0000       | 0.8333       | 0.0000       | H           | 0.4989       | -4.7234      | 0.0000       |
| C           | 1.3209       | -0.9814      | 0.0000       | H           | -1.3808      | -3.0624      | 0.0000       |
| C           | -0.0057      | -1.4103      | 0.0000       | O           | -0.3297      | 2.1622       | 0.0000       |
| O           | -0.8514      | -0.2772      | 0.0000       | C           | -1.5792      | 2.8016       | 0.0000       |
| C           | 2.3792       | -1.8683      | 0.0000       | O           | -2.6315      | 2.1838       | 0.0000       |
| C           | 2.0503       | -3.2342      | 0.0000       | C           | -1.4295      | 4.2917       | 0.0000       |
| C           | 0.7160       | -3.6645      | 0.0000       | H           | -0.3862      | 4.5874       | 0.0000       |
| C           | -0.3484      | -2.7474      | 0.0000       | H           | -1.9291      | 4.7040       | 0.8774       |
| H           | 3.4021       | -1.5234      | 0.0000       | H           | -1.9291      | 4.7040       | -0.8774      |

Table 2, entry 3, alkoxyboration product **13h**.

| <i>Atom</i> | <i>x (Å)</i> | <i>y (Å)</i> | <i>z (Å)</i> | <i>Atom</i> | <i>x (Å)</i> | <i>y (Å)</i> | <i>z (Å)</i> |
|-------------|--------------|--------------|--------------|-------------|--------------|--------------|--------------|
| C           | -1.7058      | -0.3114      | 0.0598       | O           | 1.3840       | -0.9465      | 0.0525       |
| C           | -0.7537      | 0.6400       | -0.0417      | C           | 2.7707       | -0.7106      | -0.0389      |
| C           | -1.1186      | 2.1212       | -0.0967      | C           | 2.9815       | 0.6564       | -0.2096      |
| C           | -1.1748      | 2.7703       | 1.3018       | C           | 4.2486       | 1.1943       | -0.3310      |
| H           | -2.0836      | 2.2446       | -0.5883      | C           | 5.3216       | 0.2899       | -0.2733      |
| H           | -0.3785      | 2.6467       | -0.7017      | C           | 5.1086       | -1.0854      | -0.1016      |
| H           | -1.9315      | 2.2871       | 1.9212       | C           | 3.8134       | -1.6151      | 0.0196       |
| H           | -1.4222      | 3.8315       | 1.2246       | H           | 4.3981       | 2.2552       | -0.4638      |
| H           | -0.2125      | 2.6886       | 1.8109       | H           | 6.3318       | 0.6639       | -0.3639      |
| C           | -1.5650      | -1.8027      | 0.1663       | O           | -3.0601      | 0.1549       | 0.1984       |
| C           | -2.0311      | -2.3556      | 1.5309       | C           | -4.0663      | -0.2079      | -0.6961      |
| H           | -0.5246      | -2.0704      | 0.0034       | O           | -3.8600      | -0.8634      | -1.7125      |
| H           | -2.1477      | -2.2626      | -0.6344      | C           | -5.3877      | 0.3278       | -0.2370      |
| H           | -3.0751      | -2.1102      | 1.7301       | H           | -6.1543      | 0.0664       | -0.9597      |
| H           | -1.4276      | -1.9474      | 2.3434       | H           | -5.3386      | 1.4111       | -0.1257      |
| H           | -1.9311      | -3.4420      | 1.5471       | H           | -5.6441      | -0.0864      | 0.7387       |
| B           | 0.7424       | 0.3111       | -0.0695      | H           | 3.6356       | -2.6718      | 0.1511       |
| O           | 1.7349       | 1.3083       | -0.2307      | H           | 5.9573       | -1.7539      | -0.0621      |

Table 2, entry 4, boric ester starting material **7i**.

| <i>Atom</i> | <i>x (Å)</i> | <i>y (Å)</i> | <i>z (Å)</i> | <i>Atom</i> | <i>x (Å)</i> | <i>y (Å)</i> | <i>z (Å)</i> |
|-------------|--------------|--------------|--------------|-------------|--------------|--------------|--------------|
| O           | -1.3755      | 1.0432       | 0.0000       | H           | -1.4335      | 5.6909       | 0.0000       |
| B           | -0.2262      | 0.2577       | 0.0000       | H           | 1.0302       | 5.6802       | 0.0000       |
| C           | -0.9140      | 2.3824       | 0.0000       | H           | 2.3023       | 3.5185       | 0.0000       |
| C           | 0.4798       | 2.3775       | 0.0000       | O           | -0.3113      | -1.1216      | 0.0000       |
| O           | 0.9289       | 1.0317       | 0.0000       | C           | 0.6538       | -2.0812      | 0.0000       |
| C           | -1.6458      | 3.5525       | 0.0000       | O           | 1.8558       | -1.9072      | 0.0000       |
| C           | -0.9070      | 4.7471       | 0.0000       | C           | 0.0432       | -3.4842      | 0.0000       |
| C           | 0.4954       | 4.7412       | 0.0000       | F           | -1.3371      | -3.5017      | 0.0000       |
| C           | 1.2233       | 3.5399       | 0.0000       | F           | 0.4798       | -4.1792      | 1.1234       |
| H           | -2.7250      | 3.5427       | 0.0000       | F           | 0.4798       | -4.1792      | -1.1234      |

Table 2, entry 4, alkoxyboration product **13i**.

| <i>Atom</i> | <i>x (Å)</i> | <i>y (Å)</i> | <i>z (Å)</i> | <i>Atom</i> | <i>x (Å)</i> | <i>y (Å)</i> | <i>z (Å)</i> |
|-------------|--------------|--------------|--------------|-------------|--------------|--------------|--------------|
| C           | -0.8131      | -0.4190      | 0.0526       | O           | 2.2731       | -0.9551      | 0.0422       |
| C           | 0.0943       | 0.5700       | -0.0359      | C           | 3.6552       | -0.6832      | -0.0531      |
| C           | -0.3178      | 2.0388       | -0.0725      | C           | 3.8290       | 0.6895       | -0.2169      |
| C           | -0.3293      | 2.6812       | 1.3307       | C           | 5.0803       | 1.2622       | -0.3408      |
| H           | -1.3070      | 2.1390       | -0.5173      | C           | 6.1763       | 0.3858       | -0.2928      |
| H           | 0.3811       | 2.5847       | -0.7075      | C           | 6.0005       | -0.9959      | -0.1276      |
| H           | -1.0509      | 2.1827       | 1.9790       | C           | 4.7208       | -1.5608      | -0.0038      |
| H           | -0.6048      | 3.7353       | 1.2638       | H           | 5.2013       | 2.3273       | -0.4681      |
| H           | 0.6544       | 2.6218       | 1.8001       | H           | 7.1758       | 0.7865       | -0.3856      |
| C           | -0.6534      | -1.9058      | 0.1599       | O           | -2.2001      | 0.0138       | 0.1806       |
| C           | -1.1708      | -2.4729      | 1.5007       | C           | -3.1656      | -0.3799      | -0.6854      |
| H           | 0.3998       | -2.1466      | 0.0417       | O           | -3.0337      | -1.0319      | -1.7087      |
| H           | -1.1855      | -2.3797      | -0.6686      | C           | -4.5110      | 0.1338       | -0.1749      |
| H           | -2.2272      | -2.2502      | 1.6548       | F           | -5.5298      | -0.1889      | -1.0487      |
| H           | -0.6129      | -2.0563      | 2.3404       | F           | -4.5011      | 1.5173       | -0.0213      |
| H           | -1.0492      | -3.5566      | 1.5160       | F           | -4.8166      | -0.4274      | 1.0642       |
| B           | 1.6046       | 0.2849       | -0.0693      | H           | 4.5720       | -2.6225      | 0.1228       |
| O           | 2.5632       | 1.3082       | -0.2290      | H           | 6.8668       | -1.6415      | -0.0953      |

## 2. NMR spectra for transmetalation reaction mixtures from Table 1

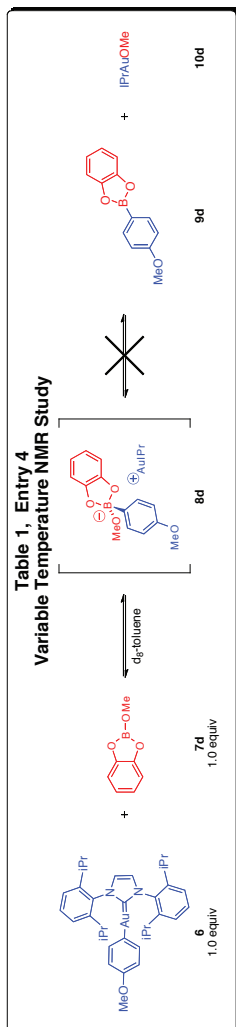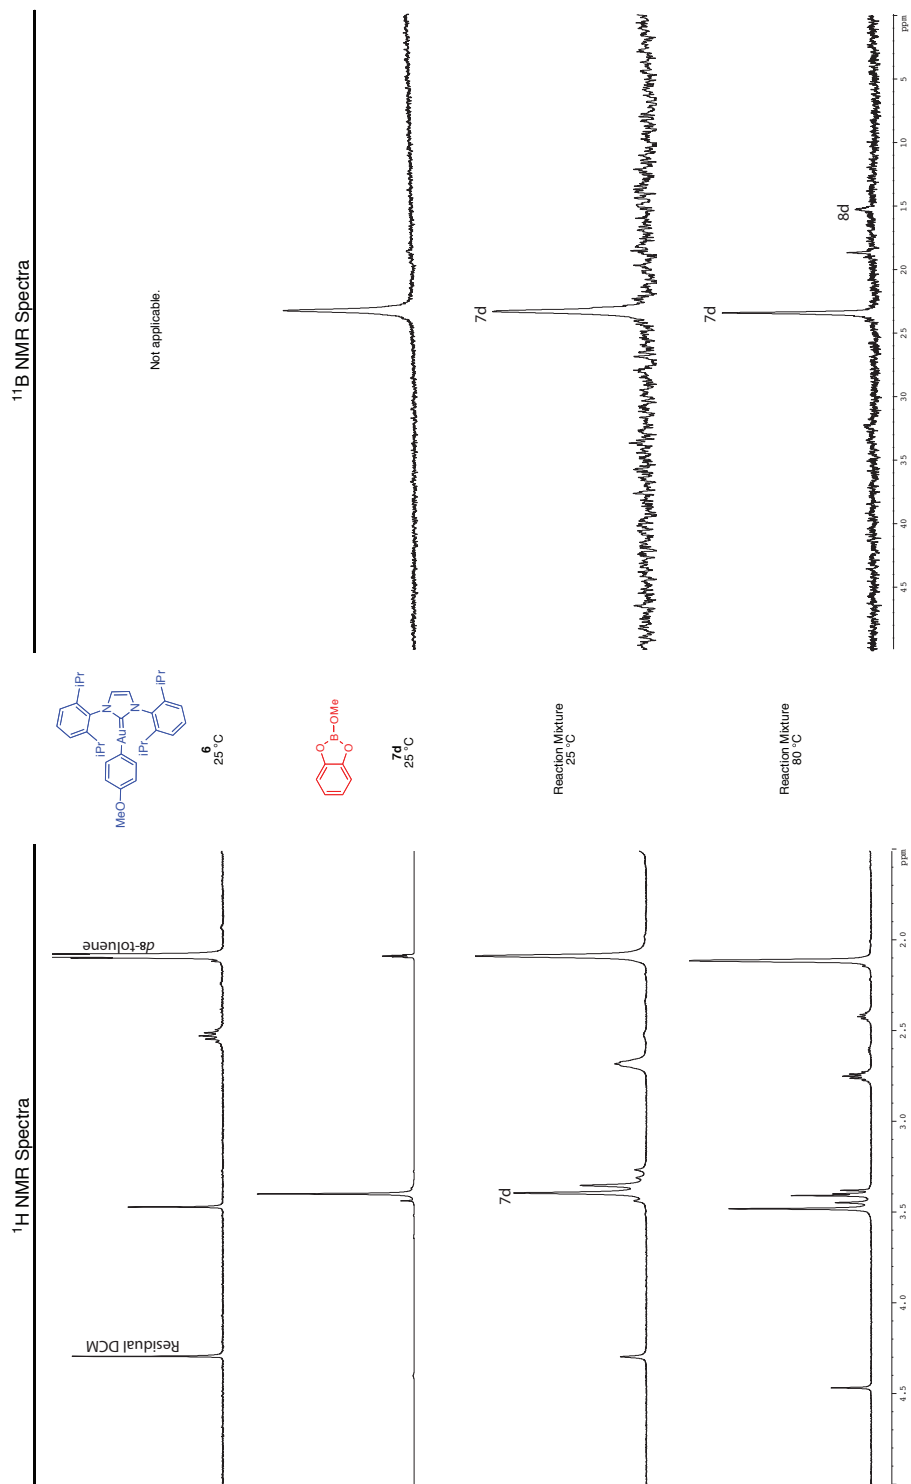

Table 1, Entry 5

Variable Temperature NMR Study

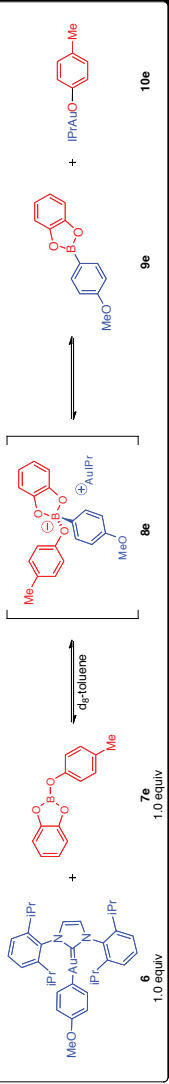

$^1\text{H}$  NMR Spectra

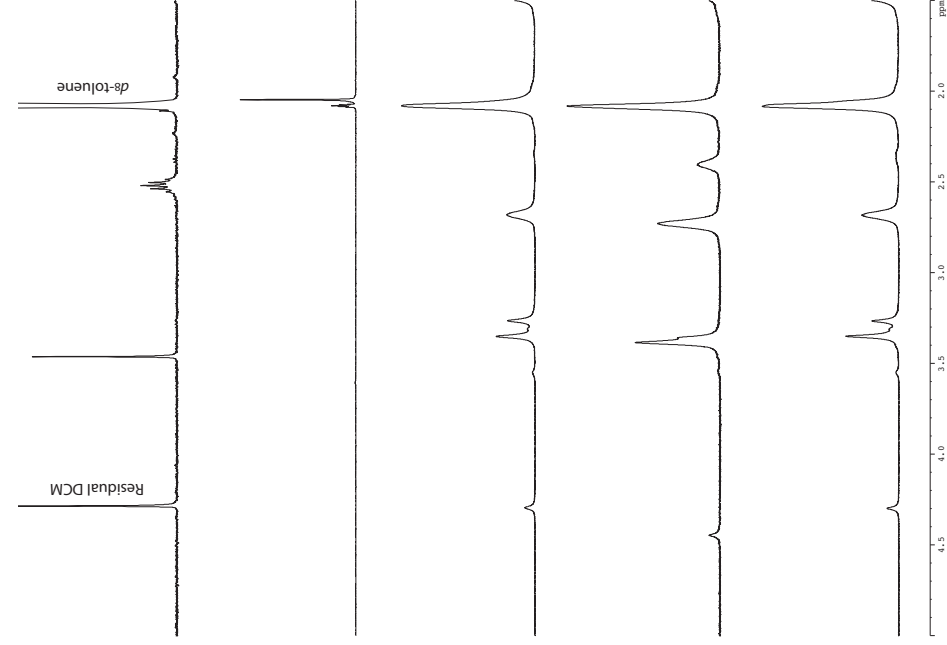

$^{11}\text{B}$  NMR Spectra

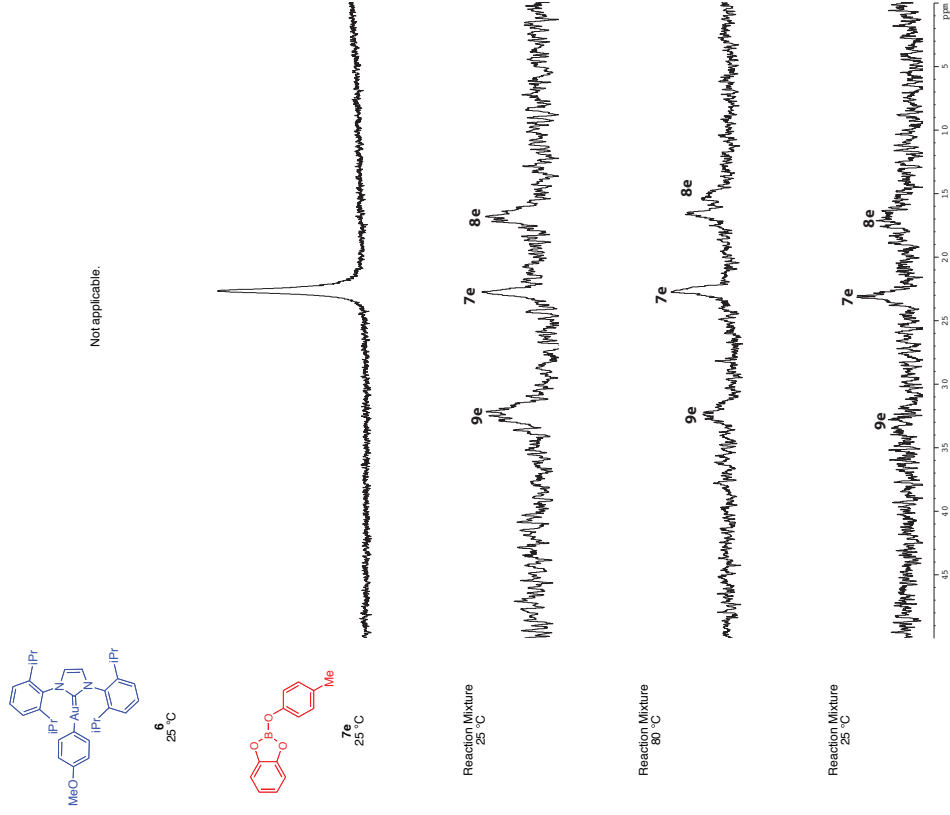

Table 1, Entry 6

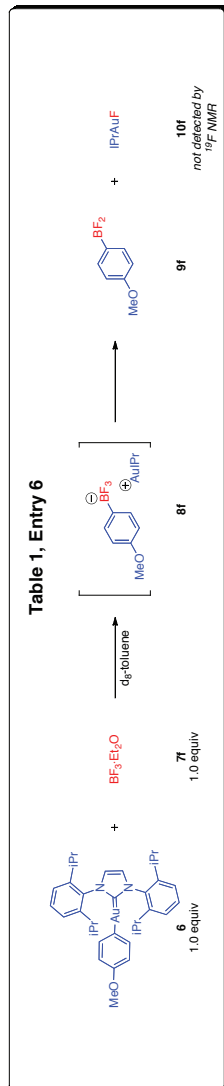

$^1\text{H}$  NMR Spectra

$^{11}\text{B}$  NMR Spectra

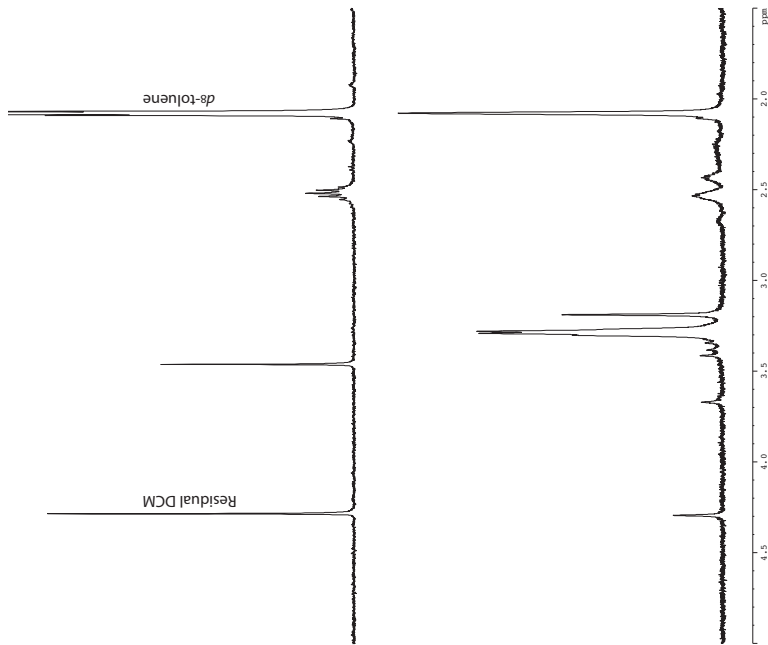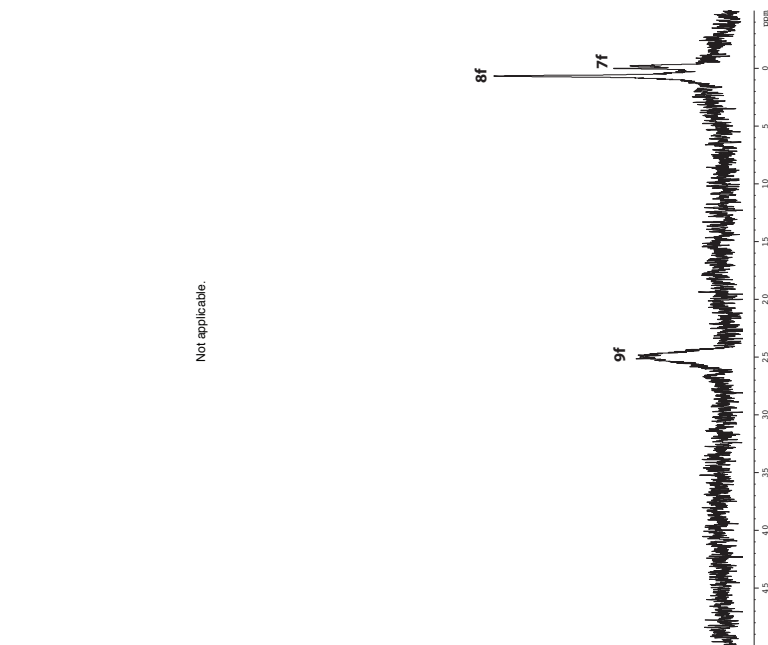

Not applicable.

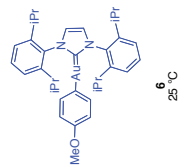

Reaction Mixture  
25 °C, t = 20 min
